# Supplementary material for: Development and validation of a stromal-immune signature to predict prognosis in intrahepatic cholangiocarcinoma
Source: PubMed Central journal article supplement — Clin Mol Hepatol. 2024 Aug 6;30(4):914–28. doi: 10.3350/cmh.2024.0296 (PMC11540385; doi:10.3350/cmh.2024.0296), 2024-08-06
Supplement: cmh-2024-0296-Supplementary-Fig-2.pdf [file cmh-2024-0296-Supplementary-Fig-2.pdf]

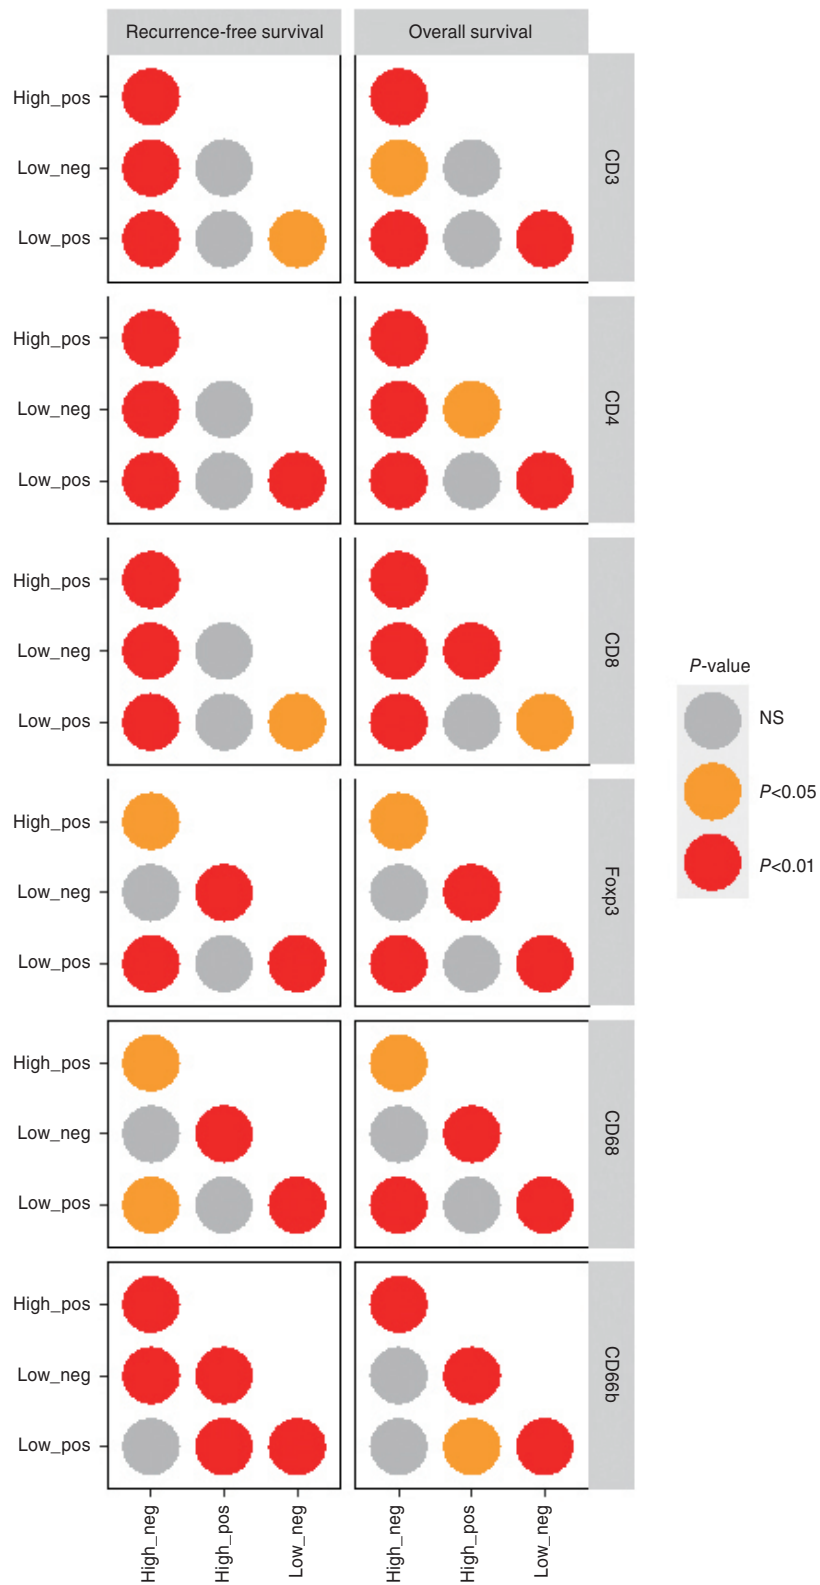

**Supplementary Figure 2.** Pairwise survival analysis for RFS and OS represents the survival difference according to lymphatic metastasis status and immune markers with Bonferroni adjustment. RFS, recurrence-free survival; OS, overall survival.
