# Supplementary material for: Development and validation of a stromal-immune signature to predict prognosis in intrahepatic cholangiocarcinoma
Source: PubMed Central journal article supplement — Clin Mol Hepatol. 2024 Aug 6;30(4):914–28. doi: 10.3350/cmh.2024.0296 (PMC11540385; doi:10.3350/cmh.2024.0296), 2024-08-06
Supplement: cmh-2024-0296-Supplementary-Fig-4.pdf [file cmh-2024-0296-Supplementary-Fig-4.pdf]

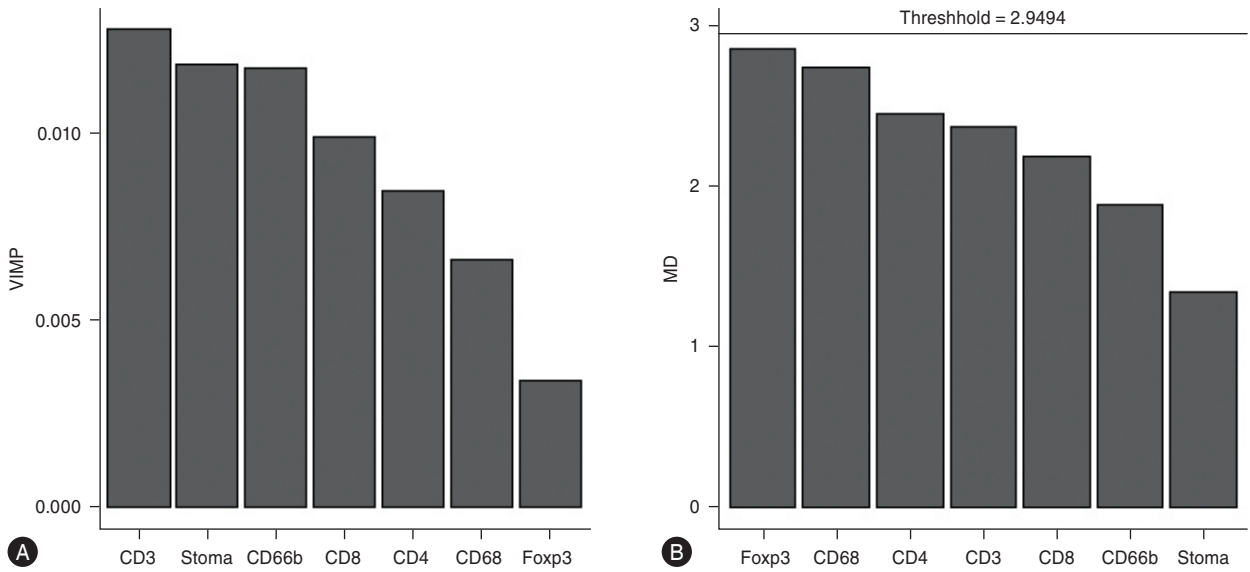

**Supplementary Figure 4.** Two important parameters of “variable of importance” (VIMP) and “minimal depth” (MD) generated in the random survival forest model help comprehend the contribution of each variable to predict RFS. RFS, recurrence-free survival.
