# Supplementary material for: Development and validation of a stromal-immune signature to predict prognosis in intrahepatic cholangiocarcinoma
Source: PubMed Central journal article supplement — Clin Mol Hepatol. 2024 Aug 6;30(4):914–28. doi: 10.3350/cmh.2024.0296 (PMC11540385; doi:10.3350/cmh.2024.0296), 2024-08-06
Supplement: cmh-2024-0296-Supplementary-Fig-5.pdf [file cmh-2024-0296-Supplementary-Fig-5.pdf]

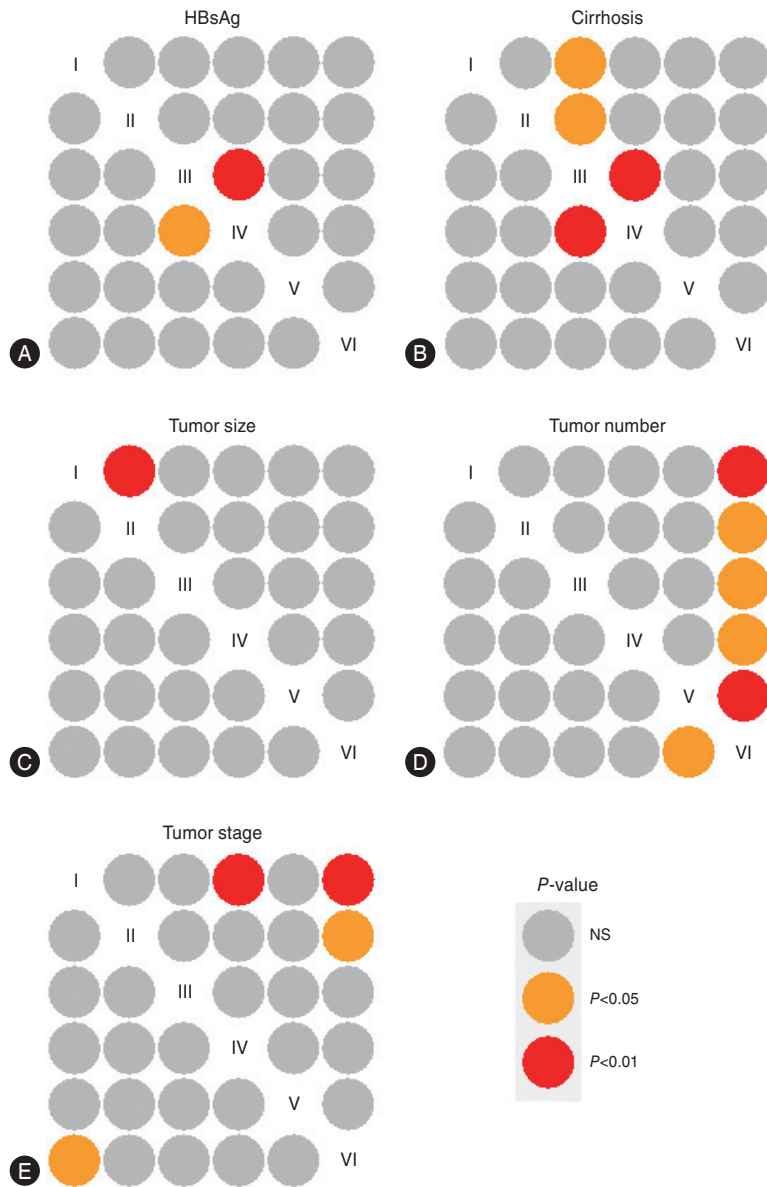

**Supplementary Figure 5.** Pairwise chi square analysis displays the *P*-value with Bonferroni adjustment in the left lower triangle and no adjustment in right upper triangle depicting the clinicopathological difference of HBsAg (A), cirrhosis (B), tumor size (C), tumor number (D) and tumor stage (E) between different stromal-immune signature.
