# Supplementary material for: Development and validation of a stromal-immune signature to predict prognosis in intrahepatic cholangiocarcinoma
Source: PubMed Central journal article supplement — Clin Mol Hepatol. 2024 Aug 6;30(4):914–28. doi: 10.3350/cmh.2024.0296 (PMC11540385; doi:10.3350/cmh.2024.0296), 2024-08-06
Supplement: cmh-2024-0296-Supplementary-Table-1.pdf [file cmh-2024-0296-Supplementary-Table-1.pdf]

**Supplementary Table 1.** Clinicopathological characteristics of the training cohort (n=359) and validation cohort (n=240)

| Characteristics       |            | Training cohort (%) | Validation cohort (%) | P-value |
|-----------------------|------------|---------------------|-----------------------|---------|
| Age, year             | ≤50        | 74 (20.6)           | 38 (15.8)             | 0.137   |
|                       | >50        | 284 (79.4)          | 202 (84.2)            |         |
| Gender                | Female     | 153 (42.6)          | 102 (42.5)            | 0.975   |
|                       | Male       | 206 (57.4)          | 138 (57.5)            |         |
| HBsAg                 | Negative   | 252 (70.2)          | 160 (66.7)            | 0.361   |
|                       | Positive   | 107 (29.8)          | 80 (33.3)             |         |
| AFP, ng/mL            | ≤20        | 317 (88.3)          | 219 (91.3)            | 0.249   |
|                       | >20        | 42 (11.7)           | 21 (8.7)              |         |
| CA19-9, U/L           | ≤36        | 149 (41.5)          | 98 (40.8)             | 0.869   |
|                       | >36        | 210 (58.5)          | 142 (59.2)            |         |
| GGT, U/L              | ≤36        | 172 (47.9)          | 134 (55.8)            | 0.057   |
|                       | >36        | 187 (52.1)          | 106 (44.2)            |         |
| Liver cirrhosis       | No         | 273 (76.0)          | 176 (73.3)            | 0.453   |
|                       | Yes        | 86 (24.0)           | 64 (26.7)             |         |
| Tumor size, cm        | ≤5         | 159 (44.3)          | 120 (50.0)            | 0.170   |
|                       | >5         | 200 (55.7)          | 120 (50.0)            |         |
| Tumor number          | Single     | 258 (71.9)          | 179 (74.6)            | 0.463   |
|                       | Multiple   | 101 (28.1)          | 61 (25.4)             |         |
| LVI                   | No         | 282 (78.6)          | 184 (76.7)            | 0.586   |
|                       | Yes        | 77 (21.4)           | 56 (23.3)             |         |
| Lymphatic metastasis  | No         | 306 (85.2)          | 210 (87.5)            | 0.432   |
|                       | Yes        | 53 (14.8)           | 30 (12.5)             |         |
| Tumor encapsulation   | Complete   | 62 (17.3)           | 29 (12.1)             | 0.083   |
|                       | None       | 297 (82.7)          | 211 (87.9)            |         |
| Tumor differentiation | I+II       | 181 (50.4)          | 102 (42.5)            | 0.057   |
|                       | III+IV     | 178 (49.6)          | 138 (57.5)            |         |
| TNM stage             | I          | 182 (50.7)          | 129 (53.7)            | 0.464   |
|                       | II+III+IV  | 177 (49.3)          | 111 (46.3)            |         |
| CD3                   | Low        | 152 (42.3)          | 76 (31.7)             | 0.008   |
|                       | High       | 207 (57.7)          | 164 (68.3)            |         |
| CD4                   | Low        | 189 (52.6)          | 49 (20.4)             | <0.001  |
|                       | High       | 170 (47.4)          | 191 (79.6)            |         |
| CD8                   | Low        | 179 (49.9)          | 105 (43.7)            | 0.142   |
|                       | High       | 180 (50.1)          | 135 (56.3)            |         |
| Foxp3                 | Low        | 256 (71.3)          | 128 (53.3)            | <0.001  |
|                       | High       | 103 (28.7)          | 112 (46.7)            |         |
| CD68                  | Low        | 218 (60.7)          | 156 (65.0)            | 0.290   |
|                       | High       | 141 (39.3)          | 84 (35.0)             |         |
| CD66b                 | Low        | 301 (83.8)          | 188 (78.3)            | 0.088   |
|                       | High       | 58 (16.2)           | 52 (21.7)             |         |
| Stroma                | Dormant    | 74 (20.7)           | 54 (22.5)             | 0.902   |
|                       | Fibrogenic | 105 (29.2)          | 71 (29.6)             |         |
|                       | Inert      | 105 (29.2)          | 70 (29.2)             |         |
|                       | Fibrolytic | 75 (20.9)           | 45 (18.7)             |         |

AFP, alpha-fetoprotein; GGT, gamma glutamyl transferase; CA 19-9, carbohydrate antigen 19-9; LVI, lymphatic vascular invasion; TNM, tumor-node-metastasis.
