# Supplementary material for: Development and validation of a stromal-immune signature to predict prognosis in intrahepatic cholangiocarcinoma
Source: PubMed Central journal article supplement — Clin Mol Hepatol. 2024 Aug 6;30(4):914–28. doi: 10.3350/cmh.2024.0296 (PMC11540385; doi:10.3350/cmh.2024.0296), 2024-08-06
Supplement: cmh-2024-0296-Supplementary-Table-2.pdf [file cmh-2024-0296-Supplementary-Table-2.pdf]

**Supplementary Table 2.** Comparisons of clinicopathological characteristics between different stroma types (n=359)

| Characteristics       |           | Dormant<br>(n=74) | Fibrogenic<br>(n=105) | Inert<br>(n=105) | Fibrolytic<br>(n=75) | Total (%)  | $\chi^2$ | P-value |
|-----------------------|-----------|-------------------|-----------------------|------------------|----------------------|------------|----------|---------|
| Age, year             | ≤50       | 13 (17.6%)        | 19 (18.1%)            | 25 (23.8%)       | 17 (22.7%)           | 74 (20.6)  | 1.68     | 0.643   |
|                       | >50       | 61 (82.4%)        | 86 (81.9%)            | 80 (76.2%)       | 58 (77.3%)           | 284 (79.4) |          |         |
| Gender                | Female    | 35 (47.3%)        | 43 (41.0%)            | 45 (42.9%)       | 30 (40.0%)           | 153 (42.6) | 0.99     | 0.803   |
|                       | Male      | 39 (52.7%)        | 62 (59.0%)            | 60 (57.1%)       | 45 (60.0%)           | 206 (57.4) |          |         |
| HBsAg                 | Negative  | 53 (71.6%)        | 77 (73.3%)            | 70 (66.7%)       | 52 (69.3%)           | 252 (70.2) | 1.22     | 0.749   |
|                       | Positive  | 21 (28.4%)        | 28 (26.7%)            | 35 (33.3%)       | 23 (30.7%)           | 107 (29.8) |          |         |
| AFP, ng/mL            | ≤20       | 66 (89.2%)        | 95 (90.5%)            | 90 (85.7%)       | 66 (88.0%)           | 317 (88.3) | 1.22     | 0.747   |
|                       | >20       | 8 (10.8%)         | 10 (9.5%)             | 15 (14.3%)       | 9 (12.0%)            | 42 (11.7)  |          |         |
| CA19-9, U/L           | ≤36       | 33 (44.6%)        | 37 (35.2%)            | 43 (41.0%)       | 36 (48.0%)           | 149 (41.5) | 3.31     | 0.347   |
|                       | >36       | 41 (55.4%)        | 68 (64.8%)            | 62 (59.0%)       | 39 (52.0%)           | 210 (58.5) |          |         |
| GGT, U/L              | ≤36       | 39 (52.7%)        | 46 (43.8%)            | 58 (55.2%)       | 29 (38.7%)           | 172(47.9)  | 6.22     | 0.102   |
|                       | >36       | 35 (47.3%)        | 59 (56.2%)            | 47 (44.8%)       | 46 (61.3%)           | 187(52.1)  |          |         |
| Liver cirrhosis       | No        | 62 (83.8%)        | 80 (76.2%)            | 72 (68.6%)       | 59 (78.7%)           | 273 (76.0) | 5.94     | 0.115   |
|                       | Yes       | 12 (16.2%)        | 25 (23.8%)            | 33 (31.4%)       | 16 (21.3%)           | 86 (24.0)  |          |         |
| Tumor size, cm        | ≤5        | 39 (52.7%)        | 53 (50.5%)            | 43 (41.0%)       | 24 (32.0%)           | 159 (44.3) | 8.82     | 0.032   |
|                       | >5        | 35 (47.3%)        | 52 (49.5%)            | 62 (59.0%)       | 51 (68.0%)           | 200 (55.7) |          |         |
| Tumor number          | Single    | 58 (78.4%)        | 83 (79.0%)            | 71 (67.6%)       | 46 (61.3%)           | 258 (71.9) | 9.28     | 0.026   |
|                       | Multiple  | 16 (21.6%)        | 22 (21.0%)            | 34 (32.4%)       | 29 (38.7%)           | 101 (28.1) |          |         |
| LVI                   | No        | 60 (81.1%)        | 86 (81.9%)            | 78 (74.3%)       | 58 (77.3%)           | 282 (78.6) | 2.18     | 0.536   |
|                       | Yes       | 14 (18.9%)        | 19 (18.1%)            | 27 (25.7%)       | 17 (22.7%)           | 77 (21.4)  |          |         |
| Lymphatic metastasis  | No        | 66 (89.2%)        | 89 (84.8%)            | 91 (86.7%)       | 60 (80.0%)           | 306 (85.2) | 2.74     | 0.433   |
|                       | Yes       | 8 (10.8%)         | 16 (15.2%)            | 14 (13.3%)       | 15 (20.0%)           | 53 (14.8)  |          |         |
| Tumor encapsulation   | Complete  | 14 (18.9%)        | 17 (16.2%)            | 22 (21.0%)       | 9 (12.0%)            | 62 (17.3)  | 2.68     | 0.444   |
|                       | None      | 60 (81.1%)        | 88 (83.8%)            | 83 (79.0%)       | 66 (88.0%)           | 297 (82.7) |          |         |
| Tumor differentiation | I+II      | 44 (59.5%)        | 54 (51.4%)            | 54 (51.4%)       | 29 (38.7%)           | 181 (50.4) | 6.65     | 0.084   |
|                       | III+IV    | 30 (40.5%)        | 51 (48.6%)            | 51 (48.6%)       | 46 (61.3%)           | 178 (49.6) |          |         |
| TNM stage             | I         | 44 (59.5%)        | 56 (53.3%)            | 51 (48.6%)       | 31 (41.3%)           | 182 (50.7) | 5.39     | 0.146   |
|                       | II+III+IV | 30 (40.5%)        | 49 (46.7%)            | 54 (51.4%)       | 44 (58.7%)           | 177 (49.3) |          |         |

AFP, alpha-fetoprotein; GGT, gamma glutamyl transferase; CA 19-9, carbohydrate antigen 19-9; LVI, lymphatic vascular invasion; TNM, tumor-node-metastasis.
