# Supplementary material for: Development and validation of a stromal-immune signature to predict prognosis in intrahepatic cholangiocarcinoma
Source: PubMed Central journal article supplement — Clin Mol Hepatol. 2024 Aug 6;30(4):914–28. doi: 10.3350/cmh.2024.0296 (PMC11540385; doi:10.3350/cmh.2024.0296), 2024-08-06
Supplement: cmh-2024-0296-Supplementary-Table-3.pdf [file cmh-2024-0296-Supplementary-Table-3.pdf]

**Supplementary Table 3.** Influences of immune infiltrated markers on prognosis in different stromal types (n=359)

| Immune markers | Stroma type | Stratification     | Recurrence-free survival |          |                     | Overall survival    |          |                     |
|----------------|-------------|--------------------|--------------------------|----------|---------------------|---------------------|----------|---------------------|
|                |             |                    | Median (95% CI)          | $\chi^2$ | P-value             | Median (95% CI)     | $\chi^2$ | P-value             |
| CD3            | Dormant     | Low                | 16.20 (6.40–39.90)       | 7.49     | 0.006               | 55.80 (9.60~)       | 5.59     | 0.018               |
|                |             | High               | NA (26.10~)              |          |                     |                     |          |                     |
|                | Fibrogenic  | Low                | 8.45 (6.20–12.00)        | 5.5      | 0.019               | 12.00 (8.60–34.70)  | 2.67     | 0.102               |
|                |             | High               | 20.60 (11.80–28.10)      |          |                     |                     |          |                     |
|                | Inert       | Low                | 10.90 (6.00–15.70)       | 5.19     | 0.023               | 16.05 (10.90–27.20) | 3.78     | 0.052               |
|                |             | High               | 21.30 (11.20–49.40)      |          |                     |                     |          |                     |
| Fibrolytic     | Low         | 6.80 (5.90–11.70)  | 3.02                     | 0.082    | 11.70 (6.00–17.70)  | 6.58                | 0.010    |                     |
|                | High        | 9.65 (6.60–17.30)  |                          |          |                     |                     |          | 25.95 (18.40–32.80) |
| CD4            | Dormant     | Low                | 19.40 (7.00–55.70)       | 5.77     | 0.016               | 55.80 (15.00~)      | 4.9      | 0.027               |
|                |             | High               | NA (17.80~)              |          |                     |                     |          |                     |
|                | Fibrogenic  | Low                | 10.20 (7.40–16.90)       | 1.79     | 0.181               | 20.20 (10.70–26.00) | 3.11     | 0.078               |
|                |             | High               | 20.20 (9.50–36.20)       |          |                     |                     |          |                     |
|                | Inert       | Low                | 11.30 (7.30–18.40)       | 5.06     | 0.025               | 17.30 (10.90–27.00) | 3.79     | 0.052               |
|                |             | High               | 21.30 (9.90–49.40)       |          |                     |                     |          |                     |
| Fibrolytic     | Low         | 6.70 (6.00–10.60)  | 5.99                     | 0.014    | 13.50 (9.10–25.50)  | 6.6                 | 0.010    |                     |
|                | High        | 9.65 (7.50–19.50)  |                          |          |                     |                     |          | 24.55 (17.70–36.90) |
| CD8            | Dormant     | Low                | 17.80 (6.70–46.20)       | 7.21     | 0.007               | 59.20 (14.97~)      | 3.3      | 0.069               |
|                |             | High               | NA (26.10~)              |          |                     |                     |          |                     |
|                | Fibrogenic  | Low                | 8.70 (6.90–14.70)        | 5.72     | 0.017               | 17.90 (10.10–26.00) | 4.62     | 0.032               |
|                |             | High               | 22.80 (10.50–41.80)      |          |                     |                     |          |                     |
|                | Inert       | Low                | 11.80 (8.60–20.90)       | 2.38     | 0.123               | 20.50 (11.80–35.20) | 2.06     | 0.151               |
|                |             | High               | 17.10 (9.50–49.40)       |          |                     |                     |          |                     |
| Fibrolytic     | Low         | 7.50 (6.10–9.70)   | 4.07                     | 0.044    | 14.80 (9.30–26.80)  | 4.36                | 0.037    |                     |
|                | High        | 10.15 (6.40–19.50) |                          |          |                     |                     |          | 24.45 (12.70–38.80) |
| Foxp3          | Dormant     | Low                | 29.90 (12.00–65.40)      | 0.97     | 0.326               | 79.70 (35.10~)      | 0.14     | 0.707               |
|                |             | High               | NA (17.17~)              |          |                     |                     |          |                     |
|                | Fibrogenic  | Low                | 16.20 (10.00–22.80)      | 3.22     | 0.073               | 26.60 (20.20–61.30) | 4.69     | 0.030               |
|                |             | High               | 9.05 (6.10–20.20)        |          |                     |                     |          |                     |
|                | Inert       | Low                | 17.30 (9.60–35.20)       | 3.18     | 0.074               | 25.70 (15.20–41.70) | 2.61     | 0.106               |
|                |             | High               | 11.30 (6.00–17.10)       |          |                     |                     |          |                     |
| Fibrolytic     | Low         | 9.10 (6.30–11.70)  | 0.58                     | 0.447    | 20.20 (10.10–28.90) | 0.53                | 0.393    |                     |
|                | High        | 8.45 (6.00–13.50)  |                          |          |                     |                     |          | 20.40 (8.50–28.90)  |
| CD68           | Dormant     | Low                | 39.90 (16.20~)           | 0.01     | 0.907               | 79.70 (49.90~)      | 1.29     | 0.256               |
|                |             | High               | 21.65 (5.00~)            |          |                     |                     |          |                     |
|                | Fibrogenic  | Low                | 15.50 (10.00–21.40)      | 1.56     | 0.212               | 24.10 (14.20–48.30) | 0.17     | 0.684               |
|                |             | High               | 9.40 (6.80–22.80)        |          |                     |                     |          |                     |
|                | Inert       | Low                | 15.40 (9.80–39.60)       | 0.11     | 0.744               | 20.90 (12.00–42.20) | 0.02     | 0.897               |
|                |             | High               | 11.80 (8.80–23.90)       |          |                     |                     |          |                     |
| Fibrolytic     | Low         | 10.80 (6.30–16.30) | 1.54                     | 0.214    | 26.20 (12.30–38.80) | 3.78                | 0.052    |                     |
|                | High        | 8.40 (6.20–9.70)   |                          |          |                     |                     |          | 18.05 (9.30–23.40)  |
| CD66b          | Dormant     | Low                | 42.80 (17.20~)           | 2.66     | 0.103               | 79.70 (42.80~)      | 1.56     | 0.212               |
|                |             | High               | 5.10 (0.00~)             |          |                     |                     |          |                     |
|                | Fibrogenic  | Low                | 15.00 (10.20–21.40)      | 2.67     | 0.102               | 23.80 (14.70–41.80) | 1.06     | 0.304               |
|                |             | High               | 6.15 (2.30–20.80)        |          |                     |                     |          |                     |
|                | Inert       | Low                | 14.20 (10.90–25.70)      | 2.05     | 0.152               | 23.10 (14.40–41.70) | 0.59     | 0.443               |
|                |             | High               | 9.20 (3.70–18.50)        |          |                     |                     |          |                     |
| Fibrolytic     | Low         | 9.60 (8.00–13.50)  | 6.98                     | 0.008    | 25.50 (17.70–29.60) | 8.21                | 0.004    |                     |
|                | High        | 5.80 (3.38–7.50)   |                          |          |                     |                     |          | 7.80 (4.90–14.80)   |

CI, confidence interval.
