# Supplementary material for: Development and validation of a stromal-immune signature to predict prognosis in intrahepatic cholangiocarcinoma
Source: PubMed Central journal article supplement — Clin Mol Hepatol. 2024 Aug 6;30(4):914–28. doi: 10.3350/cmh.2024.0296 (PMC11540385; doi:10.3350/cmh.2024.0296), 2024-08-06
Supplement: cmh-2024-0296-Supplementary-Table-4.pdf [file cmh-2024-0296-Supplementary-Table-4.pdf]

**Supplementary Table 4.** Influence of immune infiltrated and stroma markers on recurrence-free survival in different lymphatic metastatic status (n=359)

| Characteristics | Stratification | Lymph node positive |          |         | Lymph node negative |          |         |
|-----------------|----------------|---------------------|----------|---------|---------------------|----------|---------|
|                 |                | mRFS (95% CI)       | $\chi^2$ | P-value | mRFS (95% CI)       | $\chi^2$ | P-value |
| CD3             | Low            | 8.20 (5.30–9.10)    | 2.91     | 0.880   | 9.60 (7.10–15.40)   | 12.46    | <0.001  |
|                 | High           | 8.50 (2.50–18.40)   |          |         | 21.40 (17.10–36.10) |          |         |
| CD4             | Low            | 8.60 (6.20–10.90)   | 0.51     | 0.470   | 11.80 (8.10–17.30)  | 13.16    | <0.001  |
|                 | High           | 6.80 (2.50–11.70)   |          |         | 26.20 (15.70–45.90) |          |         |
| CD8             | Low            | 8.55 (6.40–10.90)   | 0.37     | 0.541   | 11.70 (8.00–16.90)  | 18.35    | <0.001  |
|                 | High           | 5.90 (2.50–11.70)   |          |         | 29.90 (16.30–49.40) |          |         |
| Foxp3           | Low            | 7.60 (5.30–9.70)    | 0.16     | 0.693   | 18.40 (12.70–24.10) | 2.23     | 0.136   |
|                 | High           | 8.55 (2.10–11.70)   |          |         | 11.80 (8.40–20.20)  |          |         |
| CD68            | Low            | 8.60 (4.90–10.90)   | 0.2      | 0.657   | 20.20 (15.40–29.90) | 4.32     | 0.038   |
|                 | High           | 7.45 (2.50–11.30)   |          |         | 10.60 (8.60–17.30)  |          |         |
| CD66b           | Low            | 8.60 (6.70–11.30)   | 12.59    | <0.001  | 19.40 (14.50–25.90) | 10.05    | 0.002   |
|                 | High           | 2.30 (0.20–5.90)    |          |         | 6.85 (5.70–15.40)   |          |         |
| Stroma          | Dormant        | 7.15 (0.10–26.10)   | 0.82     | 0.844   | 46.20 (17.80~)      | 18.4     | <0.001  |
|                 | Fibrogenic     | 8.45 (2.40–12.00)   |          |         | 15.50 (10.50–24.10) |          |         |
|                 | Inert          | 7.25 (1.60–11.70)   |          |         | 17.30 (10.20–26.20) |          |         |
|                 | Fibrolytic     | 8.50 (2.40–12.00)   |          |         | 8.50 (6.60–11.70)   |          |         |

CI, confidence interval; mRFS, median recurrence free survival.
