# Supplementary material for: Development and validation of a stromal-immune signature to predict prognosis in intrahepatic cholangiocarcinoma
Source: PubMed Central journal article supplement — Clin Mol Hepatol. 2024 Aug 6;30(4):914–28. doi: 10.3350/cmh.2024.0296 (PMC11540385; doi:10.3350/cmh.2024.0296), 2024-08-06
Supplement: cmh-2024-0296-Supplementary-Table-5.pdf [file cmh-2024-0296-Supplementary-Table-5.pdf]

**Supplementary Table 5.** Influence of immune infiltrated and stroma markers on overall survival in different lymphatic metastatic status (n=359)

| Characteristics | Stratification | Lymph node positive |          |         | Lymph node negative |          |         |
|-----------------|----------------|---------------------|----------|---------|---------------------|----------|---------|
|                 |                | mOS (95% CI)        | $\chi^2$ | P-value | mOS (95% CI)        | $\chi^2$ | P-value |
| CD3             | Low            | 8.90 (7.60–11.30)   | 2.48     | 0.115   | 20.90 (14.80–34.70) | 8.14     | 0.004   |
|                 | High           | 11.70 (8.60–22.90)  |          |         | 42.80 (28.90–61.70) |          |         |
| CD4             | Low            | 9.85 (8.30–13.50)   | 0.6      | 0.438   | 24.10 (17.30–29.90) | 14.16    | <0.001  |
|                 | High           | 11.70 (8.10–20.60)  |          |         | 55.50 (32.80–87.60) |          |         |
| CD8             | Low            | 11.05 (8.30–13.90)  | 0        | 0.956   | 24.10 (17.20–31.30) | 15.31    | <0.001  |
|                 | High           | 10.00 (5.30–18.40)  |          |         | 55.50 (30.10–NA)    |          |         |
| Foxp3           | Low            | 9.10 (8.30–16.20)   | 0.12     | 0.725   | 36.90 (36.90–49.90) | 3.4      | 0.065   |
|                 | High           | 11.35 (8.10–13.50)  |          |         | 23.10 (14.80–41.80) |          |         |
| CD68            | Low            | 10.90 (8.30–10.90)  | 0.01     | 0.923   | 46.80 (28.90–61.40) | 6        | 0.014   |
|                 | High           | 9.9 (6.20–20.60)    |          |         | 23.10 (16.40–30.10) |          |         |
| CD66b           | Low            | 11.30 (8.70–16.20)  | 9.23     | 0.002   | 39.60 (28.90–49.90) | 6.4      | 0.011   |
|                 | High           | 6.05 (0.20–10.00)   |          |         | 17.9 (9.60–26.90)   |          |         |
| Stroma          | Dormant        | 11.9 (0.10–NA)      | 1.85     | 0.605   | NA (49.90–NA)       | 18.94    | <0.001  |
|                 | Fibrogenic     | 10.6 (8.30–20.60)   |          |         | 26.90 (20.20–53.50) |          |         |
|                 | Inert          | 11.15 (5.90–12.30)  |          |         | 27.00 (17.30–42.20) |          |         |
|                 | Fibrolytic     | 9.70 (3.30–12.30)   |          |         | 23.40 (14.80–30.10) |          |         |

CI, confidence interval; mOS, median overall survival.
