# Supplementary material for: Development and validation of a stromal-immune signature to predict prognosis in intrahepatic cholangiocarcinoma
Source: PubMed Central journal article supplement — Clin Mol Hepatol. 2024 Aug 6;30(4):914–28. doi: 10.3350/cmh.2024.0296 (PMC11540385; doi:10.3350/cmh.2024.0296), 2024-08-06
Supplement: cmh-2024-0296-Supplementary-Table-6.pdf [file cmh-2024-0296-Supplementary-Table-6.pdf]

**Supplementary Table 6.** Relationship between immune-stroma signature and patient characteristics (n=359)

| Characteristics       |           | Class |    |     |     |    |    | Total (%)  | $\chi^2$ | P-value |
|-----------------------|-----------|-------|----|-----|-----|----|----|------------|----------|---------|
|                       |           | I     | II | III | IV  | V  | VI |            |          |         |
| Age, year             | ≤50       | 5     | 13 | 12  | 28  | 10 | 6  | 74 (20.6)  | 4.1      | 0.535   |
|                       | >50       | 30    | 51 | 28  | 126 | 31 | 19 | 285 (79.4) |          |         |
| Gender                | Female    | 16    | 23 | 14  | 76  | 14 | 10 | 153 (42.6) | 6.38     | 0.271   |
|                       | Male      | 19    | 41 | 26  | 78  | 27 | 15 | 206 (57.4) |          |         |
| HBsAg                 | Negative  | 24    | 42 | 20  | 120 | 28 | 18 | 252 (70.2) | 12.99    | 0.024   |
|                       | Positive  | 11    | 22 | 20  | 34  | 13 | 7  | 107 (29.8) |          |         |
| AFP, ng/mL            | ≤20       | 33    | 54 | 33  | 138 | 34 | 25 | 317 (88.3) | 8.19     | 0.146   |
|                       | >20       | 2     | 10 | 7   | 16  | 7  | 0  | 42 (11.7)  |          |         |
| CA19-9, U/L           | ≤36       | 13    | 30 | 16  | 69  | 16 | 5  | 149 (41.5) | 6.63     | 0.250   |
|                       | >36       | 22    | 34 | 24  | 85  | 25 | 20 | 210 (58.5) |          |         |
| GGT, U/L              | ≤36       | 19    | 32 | 22  | 66  | 18 | 15 | 172 (47.9) | 4.79     | 0.442   |
|                       | >36       | 16    | 32 | 18  | 88  | 23 | 10 | 187 (52.1) |          |         |
| Liver cirrhosis       | No        | 28    | 48 | 21  | 127 | 30 | 19 | 273 (76.0) | 16.19    | 0.006   |
|                       | Yes       | 7     | 16 | 19  | 27  | 11 | 6  | 86 (24.0)  |          |         |
| Tumor size, cm        | ≤5        | 23    | 26 | 19  | 57  | 20 | 14 | 159 (44.3) | 12.06    | 0.034   |
|                       | >5        | 12    | 38 | 21  | 97  | 21 | 11 | 200 (55.7) |          |         |
| Tumor number          | Single    | 39    | 48 | 31  | 105 | 34 | 11 | 258 (71.9) | 16.15    | 0.006   |
|                       | Multiple  | 6     | 16 | 9   | 49  | 7  | 14 | 101 (28.1) |          |         |
| LVI                   | No        | 32    | 54 | 28  | 115 | 33 | 20 | 282 (78.6) | 7.96     | 0.158   |
|                       | Yes       | 3     | 10 | 12  | 39  | 8  | 5  | 77 (21.4)  |          |         |
| Lymphatic metastasis  | No        | 31    | 54 | 36  | 130 | 32 | 23 | 306 (85.2) | 3.74     | 0.587   |
|                       | Yes       | 4     | 10 | 4   | 24  | 9  | 2  | 53 (14.8)  |          |         |
| Tumor encapsulation   | Complete  | 5     | 12 | 13  | 24  | 5  | 3  | 62 (17.3)  | 8.34     | 0.138   |
|                       | None      | 30    | 52 | 27  | 130 | 36 | 22 | 297 (82.7) |          |         |
| Tumor differentiation | I+II      | 20    | 33 | 14  | 84  | 16 | 14 | 181 (50.4) | 7.96     | 0.158   |
|                       | III+IV    | 15    | 31 | 26  | 70  | 25 | 11 | 178 (49.6) |          |         |
| TNM stage             | I         | 26    | 37 | 20  | 71  | 21 | 7  | 182 (50.7) | 15.55    | 0.008   |
|                       | II+III+IV | 9     | 27 | 20  | 83  | 20 | 18 | 177 (49.3) |          |         |

GGT, gamma glutamyl transferase; CA 19-9, carbohydrate antigen 19-9; LVI, lymphatic vascular invasion.
