# Supplementary material for: Development and validation of a stromal-immune signature to predict prognosis in intrahepatic cholangiocarcinoma
Source: PubMed Central journal article supplement — Clin Mol Hepatol. 2024 Aug 6;30(4):914–28. doi: 10.3350/cmh.2024.0296 (PMC11540385; doi:10.3350/cmh.2024.0296), 2024-08-06
Supplement: cmh-2024-0296-Supplementary-Table-7.pdf [file cmh-2024-0296-Supplementary-Table-7.pdf]

**Supplementary Table 7.** Kaplan–Meier analysis of differential expressions of immune and stromal markers for RFS and OS in validation cohort (n=240)

| Immune markers | Stratification | RFS                 |          |         | OS                  |          |         |
|----------------|----------------|---------------------|----------|---------|---------------------|----------|---------|
|                |                | mRFS (95% CI)       | $\chi^2$ | P-value | mOS (95% CI)        | $\chi^2$ | P-value |
| CD3            | Low            | 15.96 (12.69–19.22) | 11.19    | <0.001  | 24.03 (20.30–27.76) | 5.44     | 0.020   |
|                | High           | 23.05 (20.72–25.39) |          |         | 29.31 (26.93–31.68) |          |         |
| CD4            | Low            | 14.31 (10.82–17.80) | 17.05    | <0.001  | 23.07 (18.80–27.34) | 9.54     | 0.002   |
|                | High           | 22.47 (20.26–24.68) |          |         | 28.78 (26.54–31.03) |          |         |
| CD8            | Low            | 18.24 (15.22–21.27) | 6.59     | 0.010   | 25.80 (22.57–29.04) | 4.12     | 0.042   |
|                | High           | 22.46 (19.95–24.96) |          |         | 28.78 (26.23–31.33) |          |         |
| Foxp3          | Low            | 22.58 (20.00–25.16) | 4.58     | 0.032   | 29.82 (27.14–32.50) | 6.42     | 0.011   |
|                | High           | 18.78 (15.87–21.69) |          |         | 25.10 (22.14–28.06) |          |         |
| CD68           | Low            | 22.21 (19.67–24.76) | 3.63     | 0.057   | 29.44 (26.87–32.01) | 4.13     | 0.042   |
|                | High           | 18.20 (15.36–21.04) |          |         | 24.23 (21.17–27.29) |          |         |
| CD66b          | Low            | 22.16 (19.86–24.46) | 8.47     | 0.004   | 29.15 (26.83–31.47) | 8.55     | 0.003   |
|                | High           | 16.36 (13.13–19.59) |          |         | 22.56 (18.88–26.24) |          |         |
| Stroma         | Dormant        | 27.49 (23.21–31.77) | 37.41    | <0.001  | 33.36 (29.52–37.20) | 26.98    | <0.001  |
|                | Fibrogenic     | 22.11 (18.50–25.72) |          |         | 29.52 (25.77–33.27) |          |         |
|                | Inert          | 19.86 (16.22–23.50) |          |         | 25.47 (21.61–29.34) |          |         |
|                | Fibrolytic     | 12.20 (9.37–15.03)  |          |         | 21.05 (16.92–25.18) |          |         |

CI, confidence interval; mRFS, median recurrence-free survival time; mOS, median overall survival time; OS, overall survival; RFS, recurrence-free survival.
