# Supplementary material for: Development and validation of a stromal-immune signature to predict prognosis in intrahepatic cholangiocarcinoma
Source: PubMed Central journal article supplement — Clin Mol Hepatol. 2024 Aug 6;30(4):914–28. doi: 10.3350/cmh.2024.0296 (PMC11540385; doi:10.3350/cmh.2024.0296), 2024-08-06
Supplement: cmh-2024-0296-Supplementary-Table-8.pdf [file cmh-2024-0296-Supplementary-Table-8.pdf]

**Supplementary Table 8.** Univariate Cox proportion hazards regression analysis for RFS and OS in validation cohort (n=240)

| Characteristics       |             | Recurrence-free survival |         | Overall survival    |         |
|-----------------------|-------------|--------------------------|---------|---------------------|---------|
|                       |             | HR (95% CI)              | P-value | HR (95% CI)         | P-value |
| Age                   | Continues   | 1 (0.99 to 1.02)         | 0.612   | 1.01 (0.99 to 1.03) | 0.223   |
| Age, years            | ≤50         | 1 (referent)             |         | 1 (referent)        |         |
|                       | >50         | 1.14 (0.70 to 1.85)      | 0.598   | 1.25 (0.77 to 2.03) | 0.364   |
| Gender                | Female      | 1 (referent)             |         | 1 (referent)        |         |
|                       | Male        | 1.32 (0.934 to 1.86)     | 0.116   | 1.29 (0.92 to 1.83) | 0.143   |
| HBsAg                 | Negative    | 1 (referent)             |         | 1 (referent)        |         |
|                       | Positive    | 0.65 (0.45 to 0.94)      | 0.002   | 0.67 (0.46 to 0.97) | 0.033   |
| AFP, ng/mL            | ≤20         | 1 (referent)             |         | 1 (referent)        |         |
|                       | >20         | 0.69 (0.36 to 1.31)      | 0.254   | 0.67 (0.35 to 1.27) | 0.217   |
| CA19-9, U/L           | ≤36         | 1 (referent)             |         | 1 (referent)        |         |
|                       | >36         | 1.63 (1.15 to 2.31)      | 0.007   | 1.59 (1.12 to 2.26) | 0.010   |
| GGT, U/L              | ≤54         | 1 (referent)             |         | 1 (referent)        |         |
|                       | >54         | 2.01 (1.44 to 2.82)      | <0.001  | 1.91 (1.36 to 2.67) | <0.001  |
| Liver cirrhosis       | No          | 1 (referent)             |         | 1 (referent)        |         |
|                       | Yes         | 0.69 (0.46 to 1.02)      | 0.064   | 0.73 (0.49 to 1.09) | 0.124   |
| Tumor size, cm        | ≤5          | 1 (referent)             |         | 1 (referent)        |         |
|                       | >5          | 2.16 (1.54 to 3.04)      | <0.001  | 1.92 (1.36 to 2.69) | <0.001  |
| Tumor number          | Single      | 1 (referent)             |         | 1 (referent)        |         |
|                       | Multiple    | 1.96 (1.37 to 2.81)      | <0.001  | 1.96 (1.36 to 2.81) | <0.001  |
| LVI                   | No          | 1 (referent)             |         | 1 (referent)        |         |
|                       | Yes         | 2.29 (1.59 to 3.29)      | <0.001  | 2.24 (1.56 to 3.32) | <0.001  |
| Lymphatic metastasis  | No          | 1 (referent)             |         | 1 (referent)        |         |
|                       | Yes         | 3.13 (2.04 to 4.81)      | <0.001  | 3.11 (2.03 to 4.77) | <0.001  |
| Tumor encapsulation   | Complete    | 1 (referent)             |         | 1 (referent)        |         |
|                       | None        | 0.95 (0.57 to 1.58)      | 0.844   | 0.95 (0.57 to 1.58) | 0.852   |
| Tumor differentiation | I+II        | 1 (referent)             |         | 1 (referent)        |         |
|                       | III+IV      | 1.4 (0.97 to 2.01)       | 0.039   | 1.5 (1.04 to 2.16)  | 0.028   |
| Tumor stage           | I           | 1 (referent)             |         | 1 (referent)        |         |
|                       | II+III+IV   | 1.99 (1.42 to 2.78)      | <0.001  | 1.93 (1.38 to 2.70) | <0.001  |
| CD3                   | Low (≤40)   | 1 (referent)             |         | 1 (referent)        |         |
|                       | High (>40)  | 0.58 (0.41 to 0.83)      | 0.002   | 0.66 (0.47 to 0.94) | 0.021   |
| CD4                   | Low (≤110)  | 1 (referent)             |         | 1 (referent)        |         |
|                       | High (>110) | 0.48 (0.33 to 0.7)       | <0.001  | 0.56 (0.38 to 0.81) | 0.002   |
| CD8                   | Low (≤30)   | 1 (referent)             |         | 1 (referent)        |         |
|                       | High (>30)  | 0.66 (0.47 to 0.93)      | 0.016   | 0.71 (0.51 to 0.99) | 0.043   |
| Foxp3                 | Low (≤14)   | 1 (referent)             |         | 1 (referent)        |         |
|                       | High (>14)  | 1.57 (1.12 to 2.20)      | 0.008   | 1.54 (1.1 to 2.15)  | 0.012   |
| CD68                  | Low (≤207)  | 1 (referent)             |         | 1 (referent)        |         |
|                       | High (>207) | 1.33 (0.95 to 1.88)      | 0.010   | 1.43 (1.01 to 2.01) | 0.043   |
| CD66b                 | Low (≤480)  | 1 (referent)             |         | 1 (referent)        |         |
|                       | High (>480) | 1.66 (1.14 to 2.40)      | 0.008   | 1.73 (1.19 to 2.5)  | 0.004   |
| Stroma                | Dormant     | 1 (referent)             |         | 1 (referent)        |         |
|                       | Fibrogenic  | 2.10 (1.21 to 3.64)      | 0.009   | 1.99 (1.15 to 3.46) | 0.015   |
|                       | Inert       | 2.25 (1.29 to 3.93)      | 0.004   | 2.24 (1.29 to 3.92) | 0.004   |
|                       | Fibrolytic  | 4.86 (2.75 to 8.60)      | <0.001  | 4.04 (2.29 to 7.10) | <0.001  |

CI, confidence interval; AFP, alpha-fetoprotein; GGT, gamma glutamyl transferase; CA 19-9, carbohydrate antigen 19-9; LVI, lymphatic vascular invasion.
